# Supplementary material for: Mass-produced, dispenser-printed single-electrode triboelectric nanogenerators for wearable applications: a simple approach
Source: Royal Society of Chemistry journal article supplement (doi:10.1039/d4tc02207f), 2024-01-01
Supplement: d4tc02207f1.pdf [file d4tc02207f1.pdf]

## **Mass-Produced, Dispenser-Printed Single-Electrode Triboelectric Nanogenerators for Wearable Applications: A Simple Approach**

Chenhao Cong<sup>1,2,†</sup>, Fuhao Jiang<sup>1,†</sup>, Guangwei Wang<sup>1,†</sup>, Hongjiang Li<sup>1</sup>, Haoran Zhang<sup>1</sup>,  
Binxuan Diao<sup>1</sup>, Enhao Zhao<sup>1</sup>, Sang Woo Joo<sup>3,\*</sup>, Se Hyun Kim<sup>2,\*</sup>, Xinlin Li<sup>1,\*</sup>

<sup>1</sup>College of Mechanical and Electrical Engineering, Qingdao University, Qingdao, 266071, China

<sup>2</sup>School of Chemical Engineering, Konkuk University, Seoul, 05029, Republic of Korea

<sup>3</sup>School of Mechanical Engineering, Yeungnam University, Gyeongsan, Korea 38541, Republic of Korea

### **Corresponding Author:**

\*E-mails: swjoo@yu.ac.kr (Sang Woo Joo), shkim97@konkuk.ac.kr (Se Hyun Kim),  
xinlin0618@163.com (Xinlin Li).

†These authors contributed equally to this work

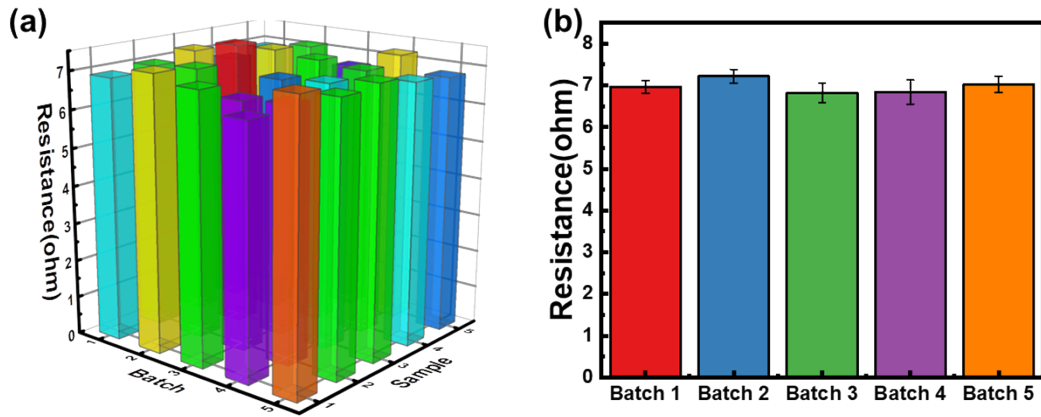

**Fig.S1.** (a) Electrode properties of different samples in different batches and (b) Electrode properties of different batches.

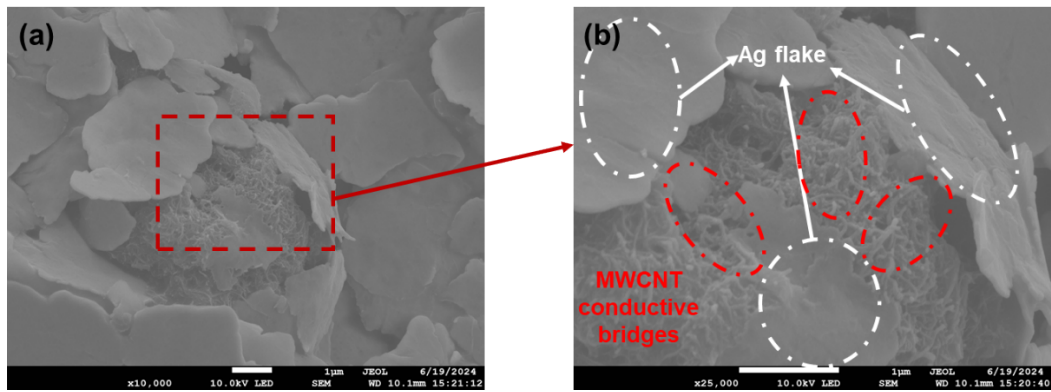

**Fig.S2.** (a) SEM image of Ag/MWCNT composite and (b) its local enlargement.

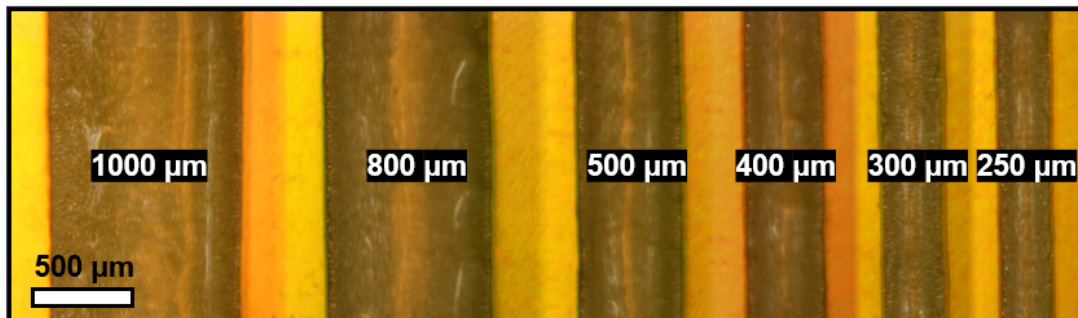

**Fig.S3.** OM images of differently printed electrodes via dispenser printing parameters.

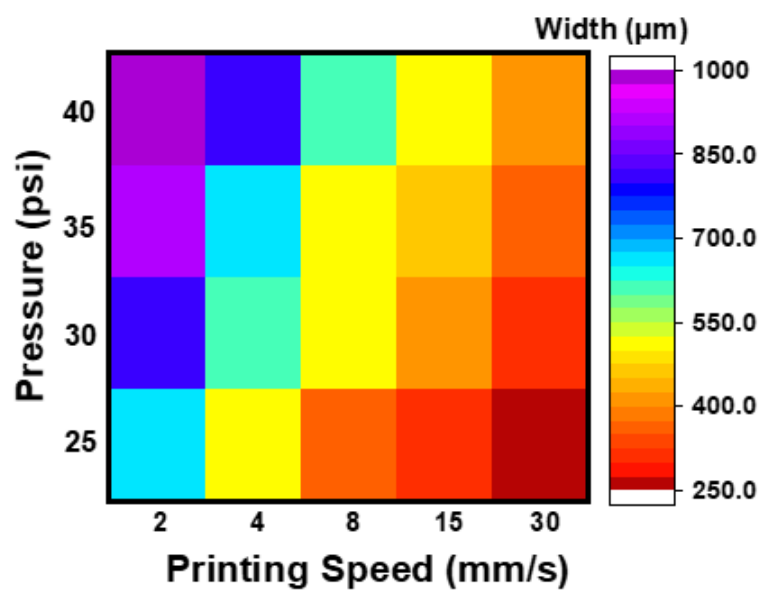

**Fig.S4.** Flexible electrode measured under OM for various printing parameters against line width.

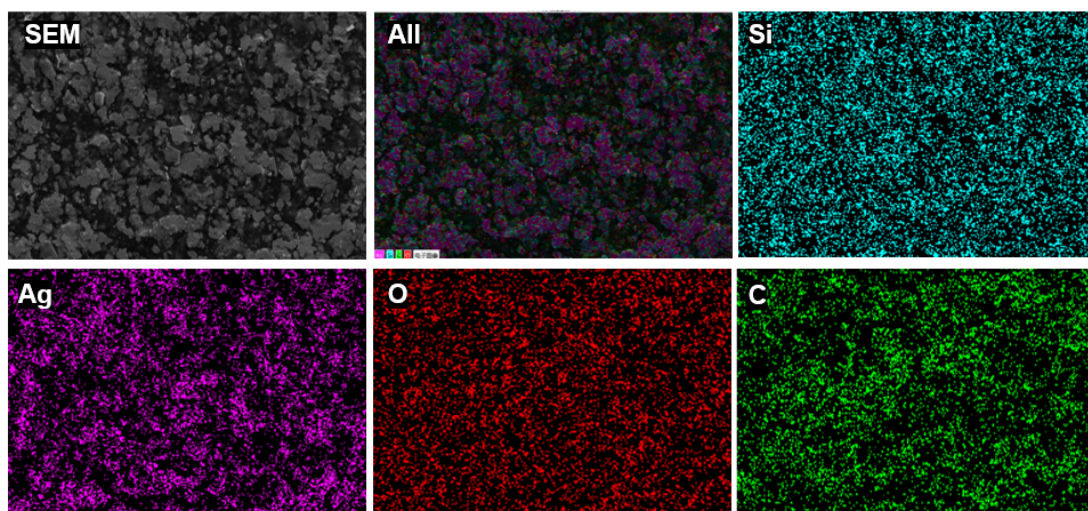

**Fig.S5.** The SEM images and EDX maps of the Ag/MWCNT/PDMS electrode.

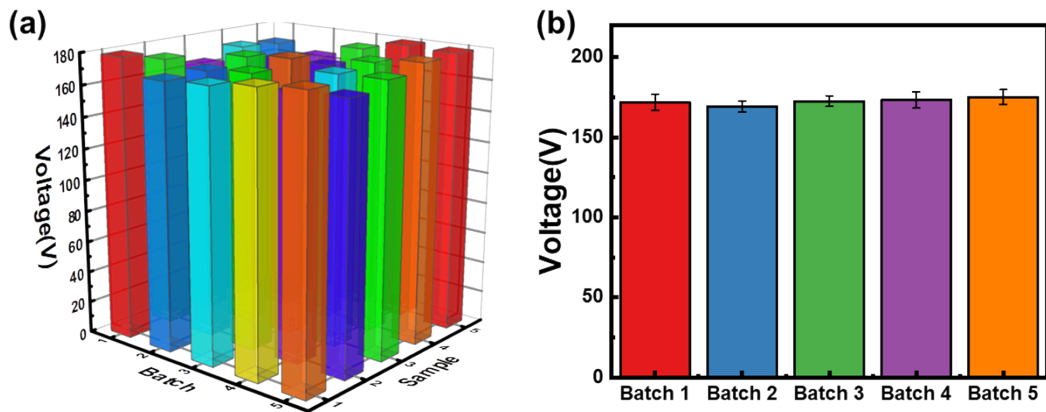

**Fig.S6.** (a) TENG voltage performance of different batches and samples and (b) Voltage performance of TENG in different batches.

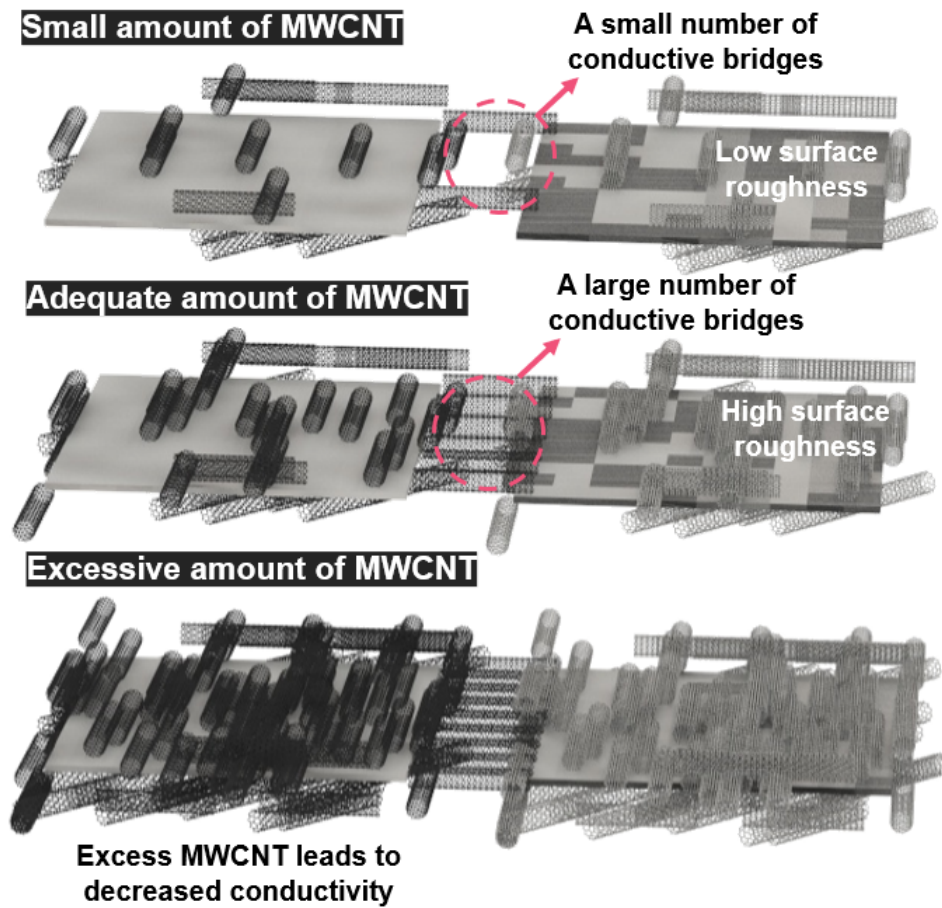

**Fig.S7.** Schematic representation of the principle of the effect of MWCNT content in the electrode on the performance of TENG.

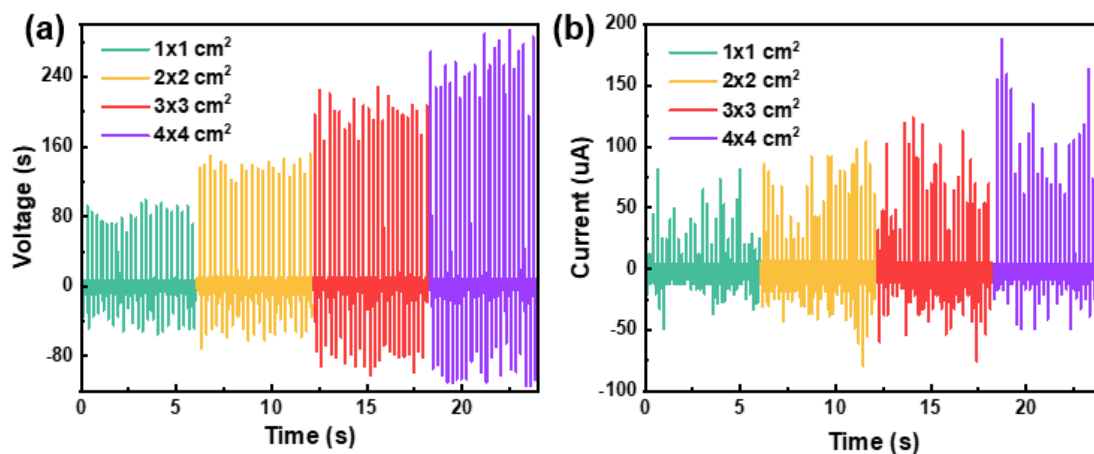

**Fig.S8.** (a) Open-circuit voltage test and (b) short-circuit current test for devices of different sizes.

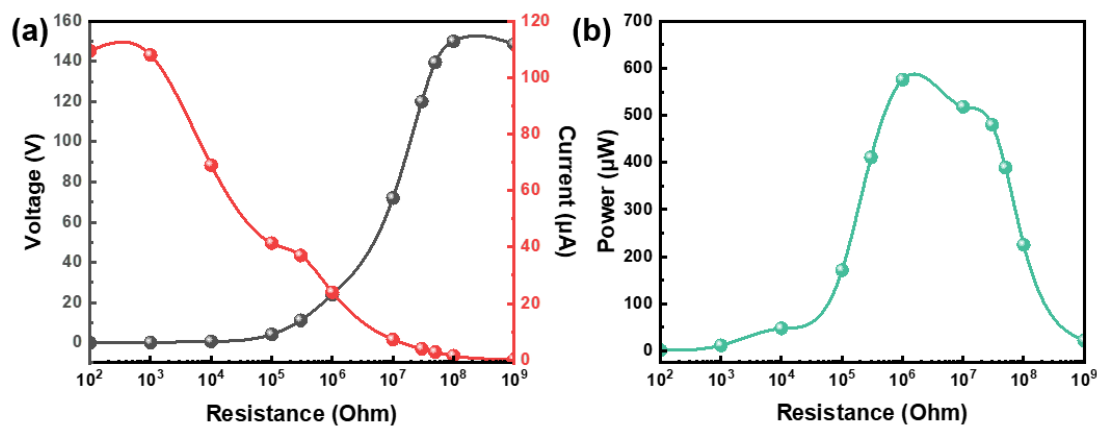

**Fig.S9.** (a) Load voltage, current and (b) Load power test.

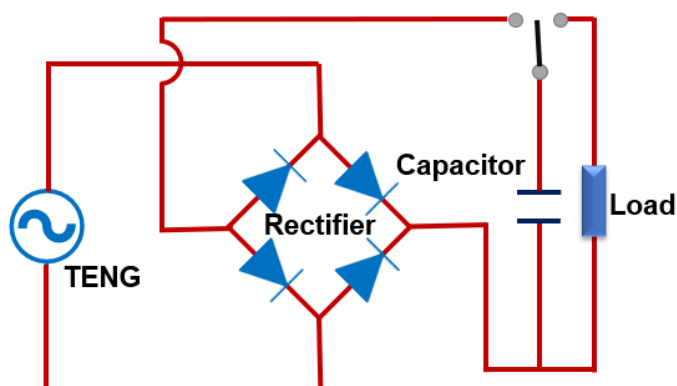

**Fig.S10.** The working electrical circuit of the TENG-based self-charging system.

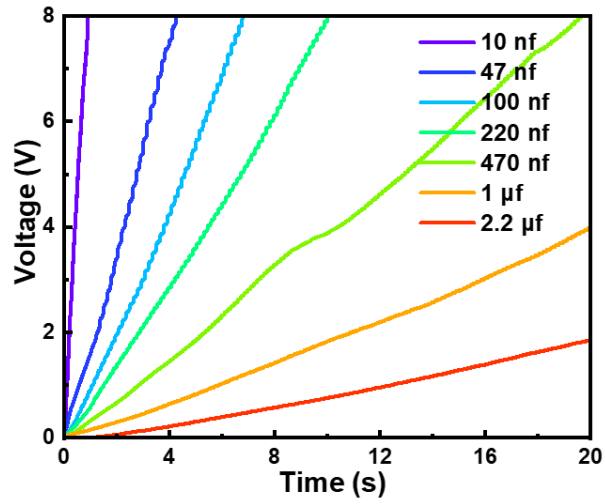

**Fig.S11.** Charging time diagram of capacitors of different sizes.

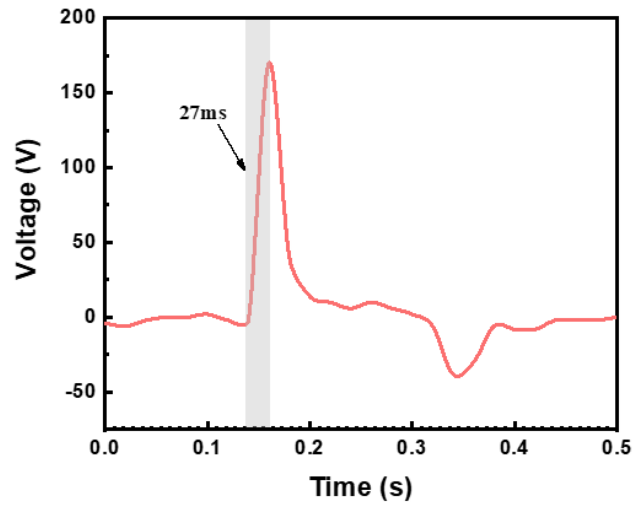

**Fig.S12.** Response time testing of TENG in human motion detection.

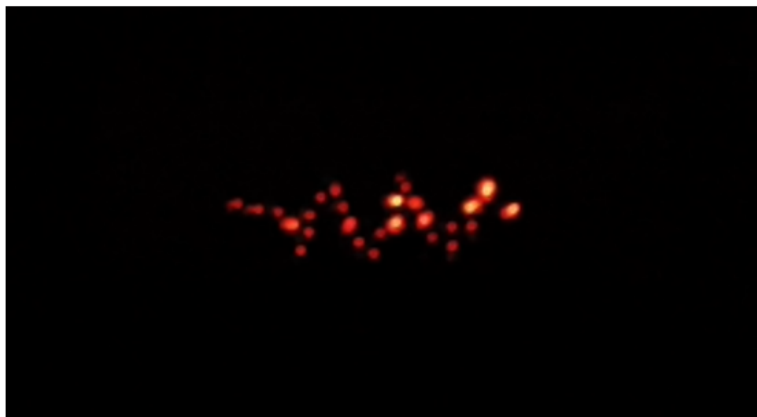

**Fig.S13.** Physical image of TENG lighting up 30 LED bulbs.

**Table.S1** The representative conductive components and properties of negative friction layer materials are reviewed.

| Base material | Filler material      | Performance         |                            | TENG type | Printing type      | Ref.      |
|---------------|----------------------|---------------------|----------------------------|-----------|--------------------|-----------|
|               |                      | V <sub>oc</sub> [V] | I <sub>sc</sub> [ $\mu$ A] |           |                    |           |
| PDMS          | Ag/MWCNT             | 172                 | 94                         | SE        | Dispenser printing | This work |
| Silicone      | PEDOT:PSS            | 8                   | -                          | SE        | Extrusion printing | [1]       |
| Aluminum foil | ABS                  | 10                  | 0.7                        | CS        | Electrospinning    | [2]       |
| PAMPS-PAAm    | NaCl                 | 380                 | 5.7                        | CS        | Electrospinning    | [3]       |
| PET           | PVC                  | 244                 | 6                          | CS        | Electrospinning    | [4]       |
| PTFE          | NaNbO <sub>3</sub>   | 141                 | 3.89                       | CS        | Electrospinning    | [5]       |
| PET           | Al                   | 125                 | 12.5                       | CS        | Electrospinning    | [6]       |
| FEP           | Cu                   | 774                 | 3.92                       | CS        | Electrospinning    | [7]       |
| PVDF          | AgNPs                | 25                  | 0.22                       | SE        | Screen printing    | [6]       |
| Nanopaper     | Silver nanoparticles | 98.2                | 13.7                       | LS        | Inkjet printer     | [8]       |
| Silicone film | Silver nanoparticles | 44.16               | -                          | CS        | Direct ink writing | [9]       |
| Bare glass    | AgNPs                | 0.25                | 1.6e-5                     | SE        | EHD jet printing   | [10]      |

**Table.S2** A comparison of the properties of TENG for electrodes of metal and carbon materials is summarized.

| Electrode material | Friction layer | Performance  |                     | Power                  | TENG type | Method                     | Ref.      |
|--------------------|----------------|--------------|---------------------|------------------------|-----------|----------------------------|-----------|
|                    |                | $V_{oc}$ [V] | $I_{sc}$ [ $\mu$ A] |                        |           |                            |           |
| Ag/MWCNT/PDMS      | PDMS           | 172          | 94                  | 1.45W/m <sup>2</sup>   | SE        | Dispenser printing         | This work |
| rGO/AgNWs          | TPU            | 42           | 0.1                 | 6mW/m <sup>2</sup>     | SE        | Spraying                   | [11]      |
| C-AgNW             | TPU            | 12.5         | 15.8                | -                      | SE        | Screen printing            | [12]      |
| AgNPs              | PVDF           | 25           | 0.22                | -                      | SE        | Screen printing            | [6]       |
| AgNPs              | Silicone film  | 44.16        | -                   | 1.03W/m <sup>2</sup>   | CS        | Inkjet printing            | [10]      |
| LM/Ag flakes/SEBS  | PVDF-HFP       | 85           | 8                   | 219.7mW/m <sup>2</sup> | SE        | Screen printing            | [13]      |
| MXene/CNT/PEDOT    | PTFE           | 184.1        | 4.42                | -                      | CS        | Vacuum-assisted filtration | [14]      |
| CNT                | Paper          | 2            | 0.012               | 40uW                   | FT        | Inkjet printing            | [15]      |
| Graphene/Cu        | PDMS           | 60           | 14                  | 91.9mW/m <sup>2</sup>  | SE        | Spin-coating               | [16]      |

## References

- [1] A. Ahmed, I. Hassan, I.M. Mosa, E. Elsanadidy, G.S. Phadke, M.F. El-Kady, J.F. Rusling, P.R. Selvaganapathy, R.B. Kaner, All printable snow-based triboelectric nanogenerator, *Nano Energy* 60 (2019) 17-25. <https://doi.org/10.1016/j.nanoen.2019.03.032>.
- [2] D. Heo, J. Chung, G. Shin, M. Seok, C. Lee, S. Lee, Yo-Yo Inspired Triboelectric Nanogenerator, *Energies* 14(7) (2021). <https://doi.org/10.3390/en14071798>.
- [3] B. Ying, R. Zuo, Y. Wan, X. Liu, An Ionic Hydrogel-Based Antifreezing Triboelectric Nanogenerator, *ACS Applied Electronic Materials* 4(4) (2022) 1930-1938. <https://doi.org/10.1021/acsaelm.2c00118>.
- [4] Y. Chi, K. Xia, Z. Zhu, J. Fu, H. Zhang, C. Du, Z. Xu, Rice paper-based biodegradable triboelectric nanogenerator, *Microelectronic Engineering* 216 (2019). <https://doi.org/10.1016/j.mee.2019.111059>.
- [5] H.H. Singh, D. Kumar, N. Khare, Tuning the performance of ferroelectric polymer-based triboelectric nanogenerator, *Applied Physics Letters* 119(5) (2021).



---

<https://doi.org/10.1063/5.0057640>.

[6] R. Cao, J. Wang, S. Zhao, W. Yang, Z. Yuan, Y. Yin, X. Du, N.-W. Li, X. Zhang, X. Li, Z.L. Wang, C. Li, Self-powered nanofiber-based screen-print triboelectric sensors for respiratory monitoring, *Nano Research* 11(7) (2018) 3771-3779. <https://doi.org/10.1007/s12274-017-1951-2>.

[7] R. Zhang, M. Hummelgård, J. Örtengren, H. Andersson, M. Olsen, W. Chen, P. Wang, C. Dahlström, A. Eivazi, M. Norgren, Energy Harvesting Using Wastepaper - Based Triboelectric Nanogenerators, *Advanced Engineering Materials* 25(11) (2023). <https://doi.org/10.1002/adem.202300107>.

[8] B. Im, S.-K. Lee, G. Kang, J. Moon, D. Byun, D.-H. Cho, Electrohydrodynamic jet printed silver-grid electrode for transparent raindrop energy-based triboelectric nanogenerator, *Nano Energy* 95 (2022). <https://doi.org/10.1016/j.nanoen.2022.107049>.

[9] M.-L. Seol, J.-W. Han, D.-I. Moon, K.J. Yoon, C.S. Hwang, M. Meyyappan, All-printed triboelectric nanogenerator, *Nano Energy* 44 (2018) 82-88. <https://doi.org/10.1016/j.nanoen.2017.11.067>.

[10] H. Li, X. Fang, R. Li, B. Liu, H. Tang, X. Ding, Y. Xie, R. Zhou, G. Zhou, Y. Tang, All-printed soft triboelectric nanogenerator for energy harvesting and tactile sensing, *Nano Energy* 78 (2020). <https://doi.org/10.1016/j.nanoen.2020.105288>.

[11] K. Zhou, Y. Zhao, X. Sun, Z. Yuan, G. Zheng, K. Dai, L. Mi, C. Pan, C. Liu, C. Shen, Ultra-stretchable triboelectric nanogenerator as high-sensitive and self-powered electronic skins for energy harvesting and tactile sensing, *Nano Energy* 70 (2020). <https://doi.org/10.1016/j.nanoen.2020.104546>.

[12] G. Zhu, P. Ren, J. Yang, J. Hu, Z. Dai, H. Chen, Y. Li, Z. Li, Self-powered and multi-mode flexible sensing film with patterned conductive network for wireless monitoring in healthcare, *Nano Energy* 98 (2022). <https://doi.org/10.1016/j.nanoen.2022.107327>.

[13] Y. Li, J. Xiong, J. Lv, J. Chen, D. Gao, X. Zhang, P.S. Lee, Mechanically interlocked stretchable nanofibers for multifunctional wearable triboelectric nanogenerator, *Nano Energy* 78 (2020). <https://doi.org/10.1016/j.nanoen.2020.105358>.

[14] X. Yang, F. Wu, C. Xu, L. Yang, S. Yin, A flexible high-output triboelectric nanogenerator based on MXene/CNT/PEDOT hybrid film for self-powered wearable sensors, *Journal of Alloys and Compounds* 928 (2022). <https://doi.org/10.1016/j.jallcom.2022.167137>.

[15] D.-S. Zhang, W.-Z. Song, L.-X. Wu, C.-L. Li, T. Chen, D.-J. Sun, M. Zhang, T.-T. Zhang, J. Zhang, S. Ramakrishna, Y.-Z. Long, In-plane electrodes enhance the output performance of triboelectric nanogenerators and their applicability in IoT applications, *Nano Energy* (2023). <https://doi.org/10.1016/j.nanoen.2023.108313>.

[16] Y. Li, W. Zheng, H. Zhang, H. Wang, H. Cai, Y. Zhang, Z. Yang, Electron transfer mechanism of graphene/Cu heterostructure for improving the stability of triboelectric nanogenerators, *Nano Energy* 70 (2020). <https://doi.org/10.1016/j.nanoen.2020.104540>.
